# Supplementary material for: Chiral covalent organic frameworks synthesized via a Suzuki–Miyaura-coupling reaction: enantioselective recognition of d/l-amino acids
Source: Royal Society of Chemistry journal article supplement (doi:10.1039/d2nj05811a), 2023-01-01
Supplement: d2nj05811a1.pdf [file d2nj05811a1.pdf]

## Supporting information

### **Chiral covalent organic frameworks synthesized via Suzuki–Miyaura–coupling reaction: Enantioselective recognition of D/L-amino acids**

Dongdong Tan, Tianmiao Wang, Jing Hu, Donglian Deng, Tingting Li, Ruijun Li\*

Department of Analytical Chemistry, China Pharmaceutical University, No. 24 TongJiaXiang,  
Nanjing, 210009, China

\*Corresponding author: Ruijun Li

Tel.: +86 25 86185150

Fax: +86 25 86185160

E-mail: ccjlrj@cpu.edu.cn (R.J. Li)

postal address: Department of Analytical Chemistry, China Pharmaceutical University, 24  
TongJiaXiang, Nanjing, Jiangsu, China 210009

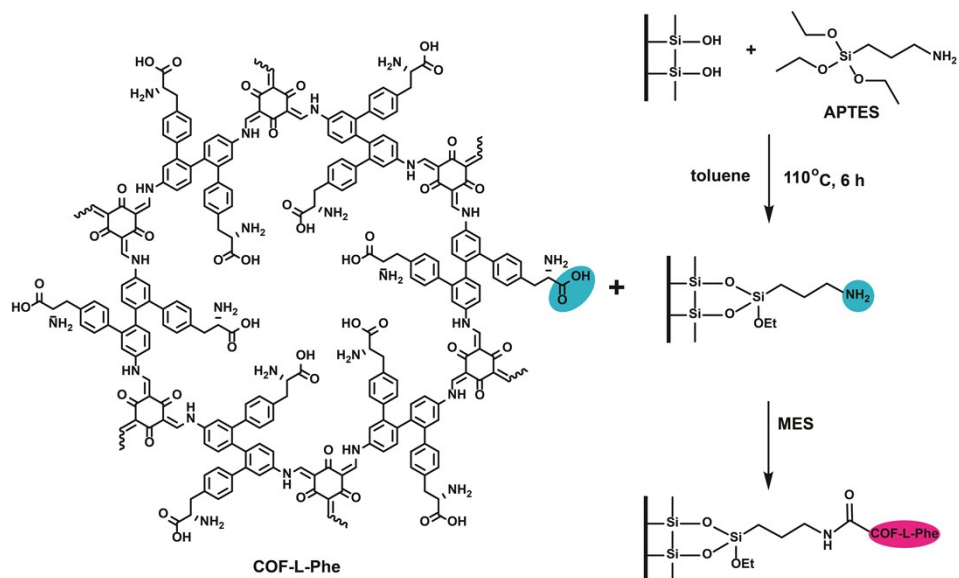

**Scheme. S1** Schematic diagram of preparation of COF-L-Phe modified open-tube column.

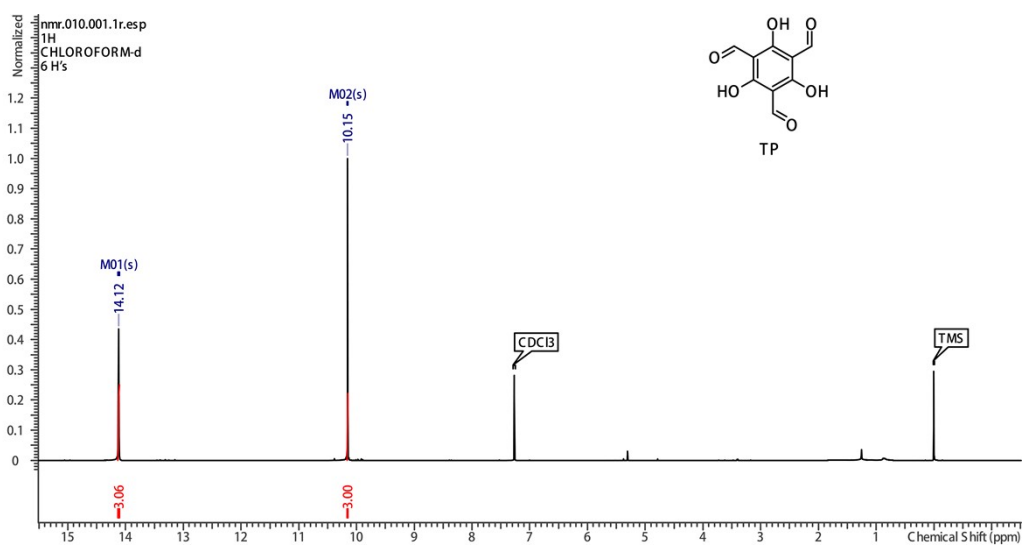

**Fig. S1** <sup>1</sup>H-NMR of Tp.

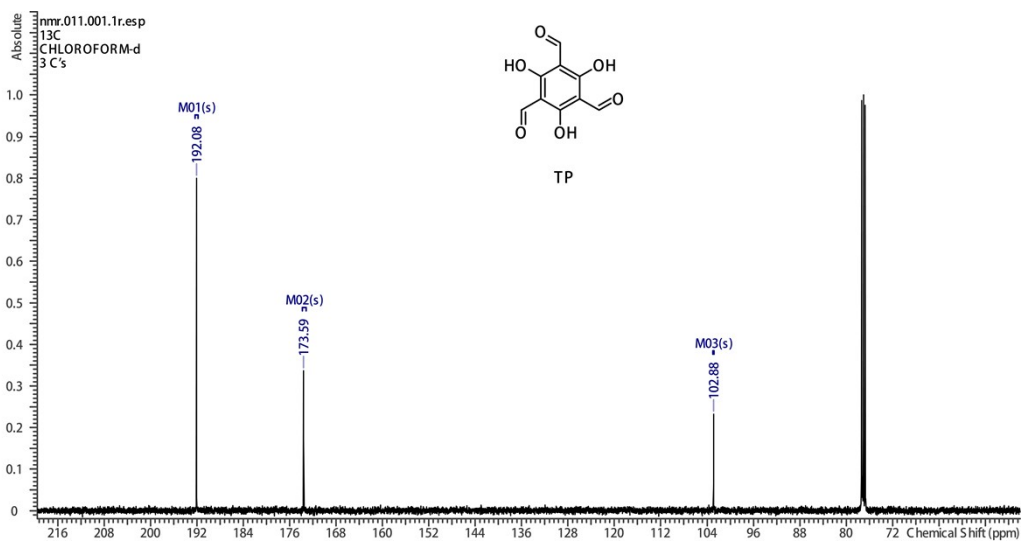

Fig. S2  $^{13}\text{C}$ -NMR of Tp.

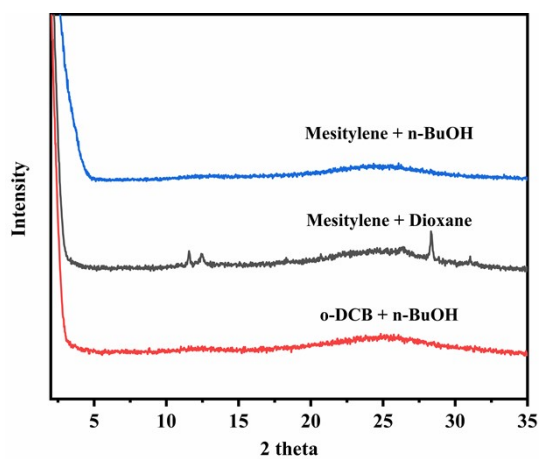

Fig. S3 PXRD patterns of COF-Br prepared in different solvents.

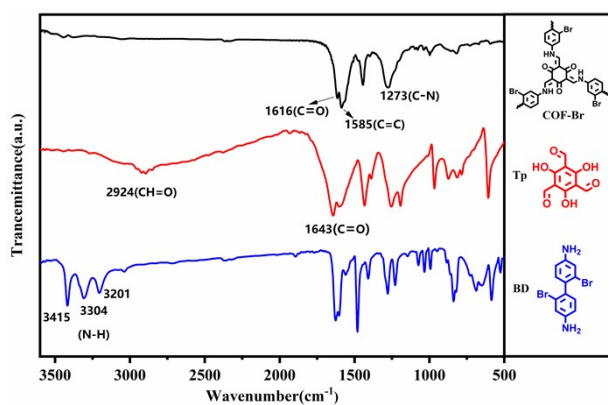

Fig. S4 FT-IR spectra of Tp, BD, COF-Br.

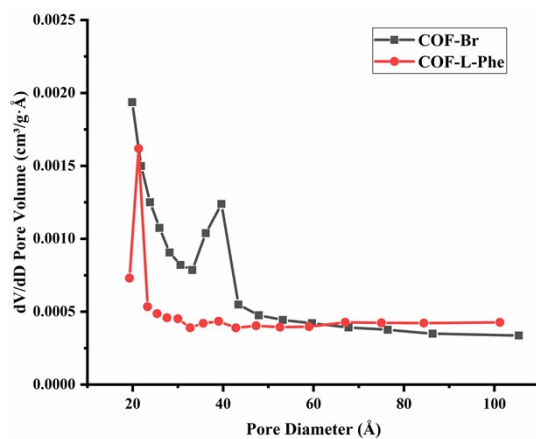

Fig. S5 Pore size distribution of COF-Br (black) and COF-L-Phe (red).

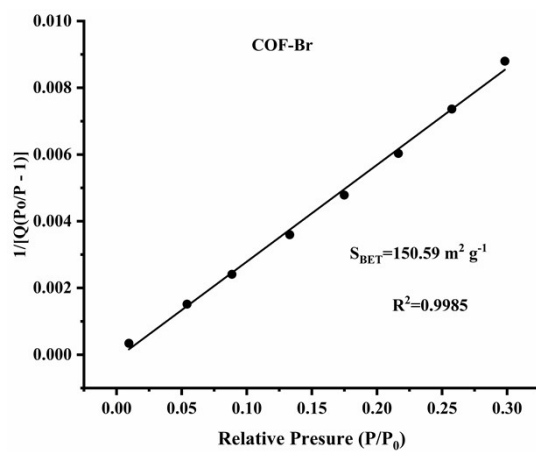

Fig. S6 BET plot of COF-Br.

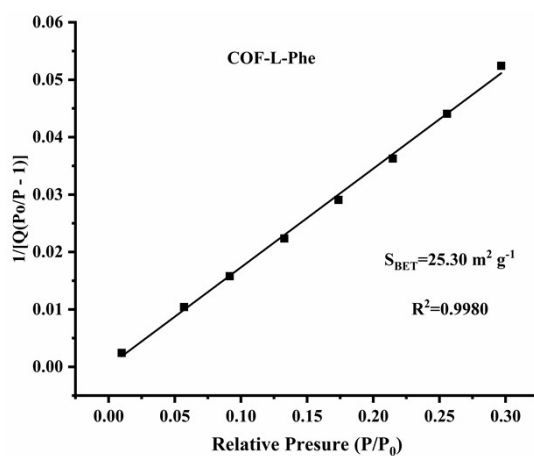

Fig. S7 BET plot of COF-L-Phe.

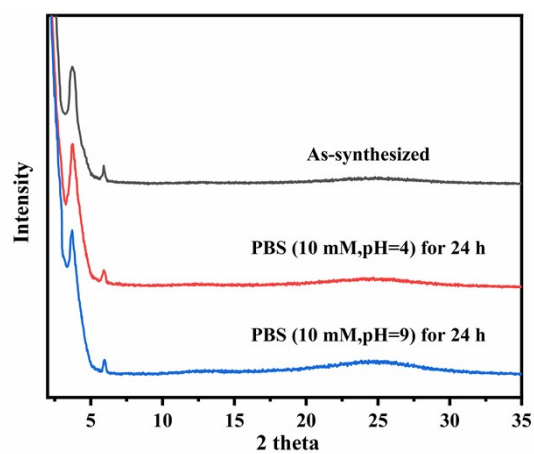

**Fig. S8** PXR D patterns of measured after 24 h treatment of COF-Br in phosphate buffer with pH=4.0 and pH=9.0.

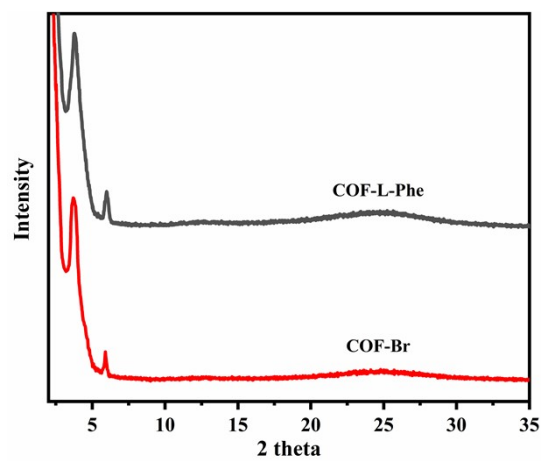

**Fig. S9** PXR D patterns of COF-Br (black) and COF-L-Phe (red).

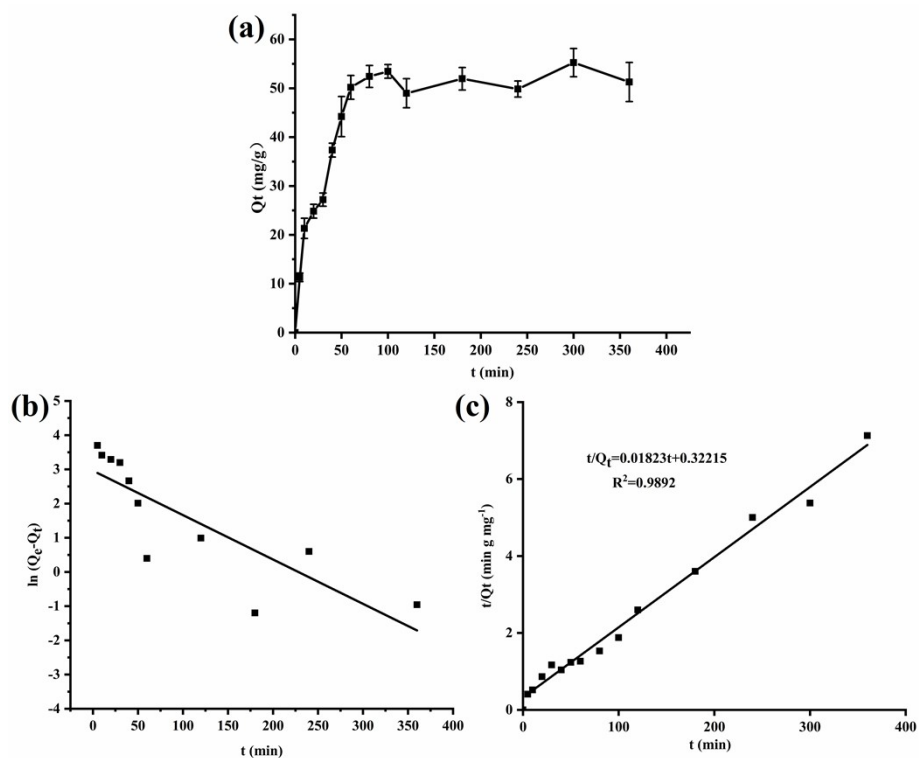

**Fig. S10** a) Time-dependent adsorption of Phenylalanine on COF-L-Phe; b) Pseudo-first-order kinetics equation; c) Pseudo-Second-order adsorption kinetics fitting of COF-L-Phe for Phenylalanine adsorption.

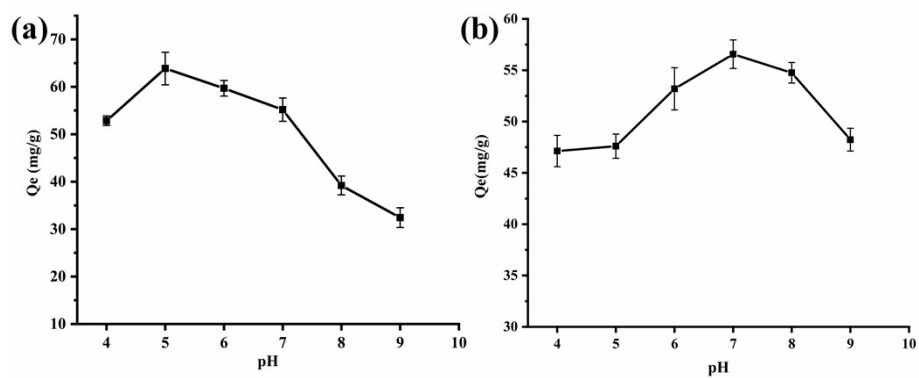

**Fig. S11** The equilibrium adsorption capacity of COF-L-Phe for a) Phenylalanine and b) Tryptophan under different pH conditions.

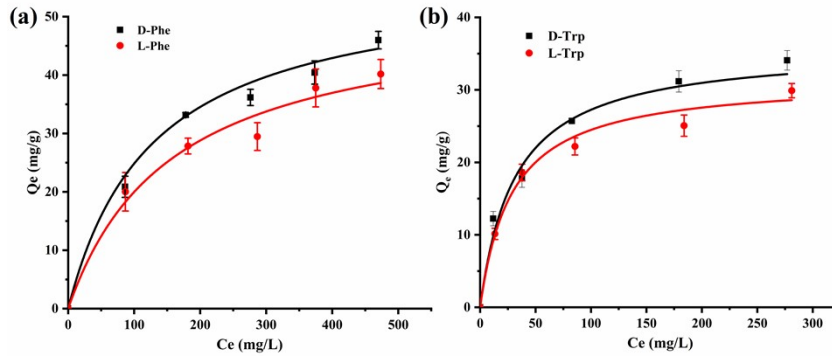

**Fig. S12** The adsorption equilibrium isotherms of COF-Br for a) Phenylalanine; b) Tryptophan.

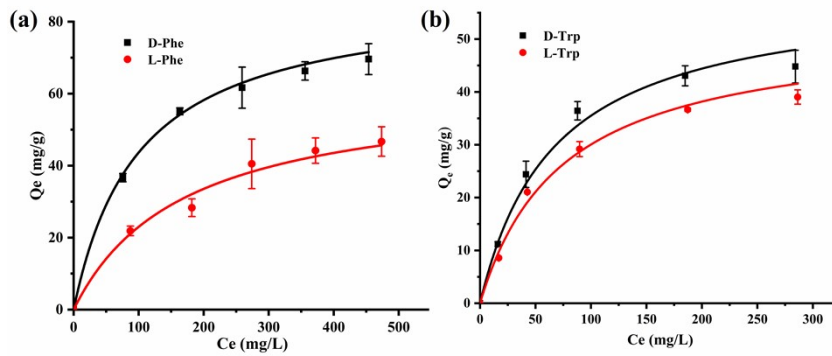

**Fig. S13** The adsorption equilibrium isotherms of COF-L-Phe for a) Phenylalanine; b) Tryptophan.

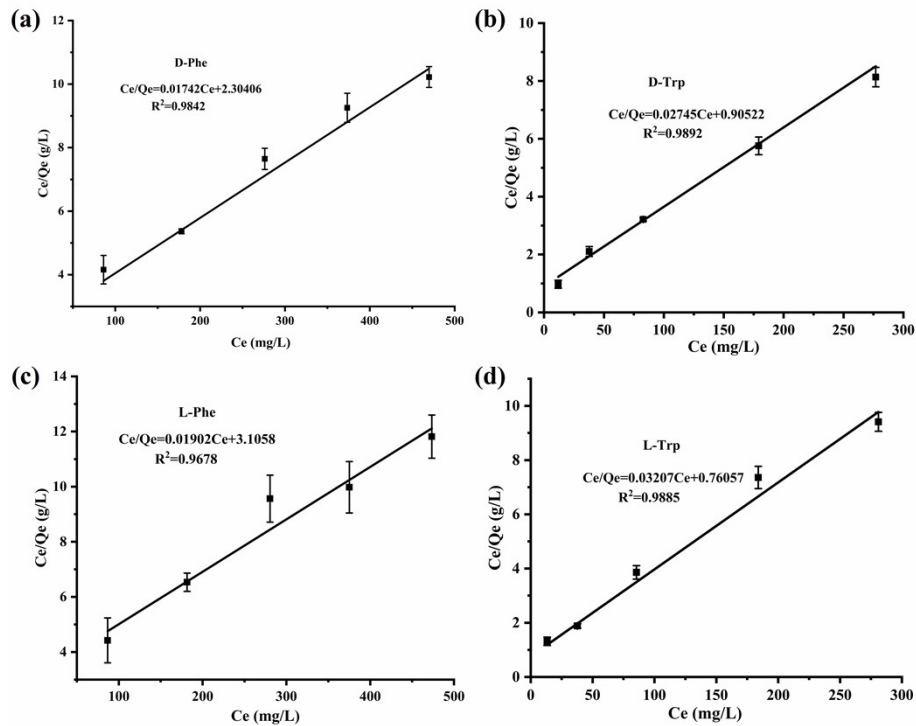

**Fig. S14** The Langmuir isotherm about the adsorption for a) *D*-, c) *L*-Phenylalanine; b) *D*-, d) *L*-Tryptophan on COF-Br.

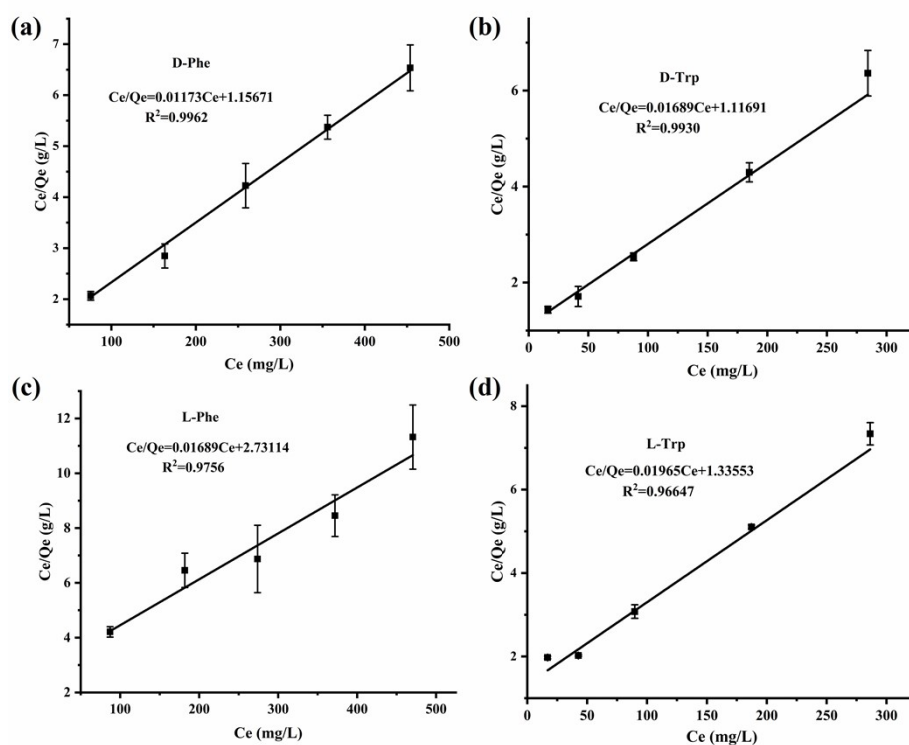

**Fig. S15** The Langmuir isotherm about the adsorption for a) *D*-, c) *L*-Phenylalanine; b) *D*-, d) *L*-Tryptophan on COF-L-Phe.

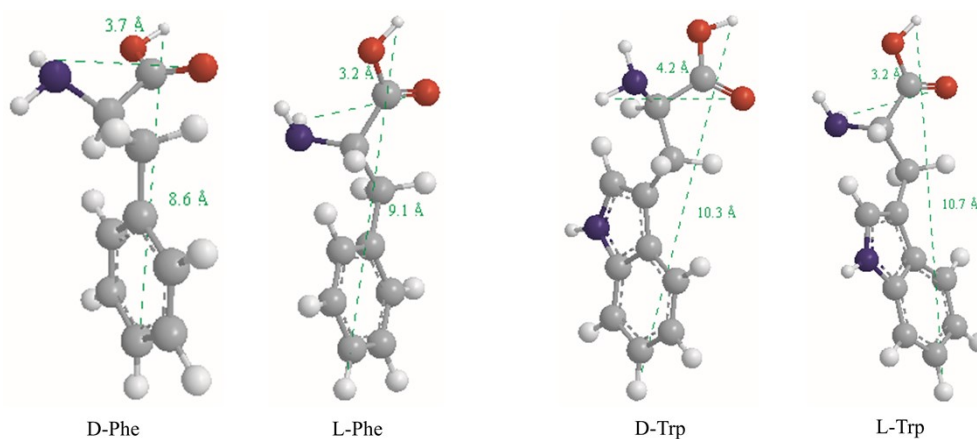

**Fig. S16** Structure and molecular dimension of the racemates (calculated with ChemBio3D Ultra).

**Table. S1** Fractional atomic coordinates for the simulated unit cells of COF-Br

| P-6m group                                        |       |         |         |      |         |        |         |
|---------------------------------------------------|-------|---------|---------|------|---------|--------|---------|
| a = b = 29.907 Å, c = 3.9361 Å                    |       |         |         |      |         |        |         |
| $\alpha = \beta = 120^\circ, \lambda = 120^\circ$ |       |         |         |      |         |        |         |
| Atom                                              | X/a   | Y/b     | Z/c     | Atom | X/a     | Y/b    | Z/c     |
| C1                                                | 0.571 | 0.46208 | 0.69055 | C52  | 0.48521 | 0.9732 | 0.27757 |



|     |         |         |         |     |         |         |         |
|-----|---------|---------|---------|-----|---------|---------|---------|
| C2  | 0.54986 | 0.49399 | 0.74478 | C53 | 0.4341  | 0.95222 | 0.37716 |
| C3  | 0.49992 | 0.47839 | 0.62638 | C54 | 0.40009 | 0.89881 | 0.3711  |
| C4  | 0.47356 | 0.43055 | 0.45401 | N1  | 0.56581 | 0.38236 | 0.44997 |
| C5  | 0.49489 | 0.39903 | 0.40246 | N2  | 0.41615 | 0.61523 | 0.74469 |
| C6  | 0.54404 | 0.41479 | 0.51533 | N3  | 0.80584 | 0.43474 | 0.52623 |
| C7  | 0.47606 | 0.51207 | 0.6595  | N4  | 0.62094 | 0.19407 | 0.4559  |
| C8  | 0.505   | 0.56528 | 0.57748 | N5  | 0.18348 | 0.57727 | 0.51596 |
| C9  | 0.4851  | 0.59842 | 0.60865 | N6  | 0.38016 | 0.80927 | 0.27406 |
| C10 | 0.43494 | 0.57942 | 0.71355 | Br1 | 0.59292 | 0.55808 | 0.97812 |
| C11 | 0.40476 | 0.5261  | 0.78421 | Br2 | 0.37674 | 0.42067 | 0.85271 |
| C12 | 0.4244  | 0.49241 | 0.75554 | Br3 | 0.44372 | 0.05053 | 0.96877 |
| C13 | 0.61971 | 0.40307 | 0.42355 | Br4 | 0.95164 | 0.39418 | 0.83316 |
| C14 | 0.36313 | 0.59999 | 0.74997 | Br5 | 0.03957 | 0.61618 | 0.90829 |
| C15 | 0.6417  | 0.37323 | 0.44218 | Br6 | 0.5697  | 0.95695 | 0.05158 |
| C16 | 0.34529 | 0.63154 | 0.64859 | O1  | 0.70188 | 0.28147 | 0.17805 |
| C17 | 0.61308 | 0.31736 | 0.54246 | O2  | 0.72099 | 0.44117 | 0.26081 |
| C18 | 0.63318 | 0.28231 | 0.45364 | O3  | 0.57437 | 0.30074 | 0.71221 |
| C19 | 0.68646 | 0.30686 | 0.32842 | O4  | 0.41732 | 0.69173 | 0.33974 |
| C20 | 0.72057 | 0.36338 | 0.37606 | O5  | 0.26271 | 0.5734  | 0.84299 |
| C21 | 0.69668 | 0.39638 | 0.36247 | O6  | 0.29499 | 0.73663 | 0.63748 |
| C22 | 0.37782 | 0.68272 | 0.47896 | H1  | 0.60869 | 0.47437 | 0.78767 |
| C23 | 0.36092 | 0.72188 | 0.458   | H2  | 0.43658 | 0.41758 | 0.34931 |
| C24 | 0.30781 | 0.70499 | 0.5618  | H3  | 0.47341 | 0.36276 | 0.26499 |
| C25 | 0.2707  | 0.64889 | 0.59301 | H4  | 0.54144 | 0.34433 | 0.36728 |
| C26 | 0.2906  | 0.61444 | 0.6985  | H5  | 0.54338 | 0.5819  | 0.48522 |
| C27 | 0.77068 | 0.3819  | 0.42813 | H6  | 0.50887 | 0.63919 | 0.54594 |
| C28 | 0.60298 | 0.23036 | 0.49033 | H7  | 0.36586 | 0.50989 | 0.86625 |
| C29 | 0.39412 | 0.77056 | 0.34819 | H8  | 0.44326 | 0.6546  | 0.76832 |
| C30 | 0.22104 | 0.63159 | 0.53266 | H9  | 0.64314 | 0.44418 | 0.36849 |
| C31 | 0.85961 | 0.45453 | 0.5512  | H10 | 0.33643 | 0.56225 | 0.85232 |
| C32 | 0.58704 | 0.13954 | 0.39741 | H11 | 0.78469 | 0.35486 | 0.40972 |
| C33 | 0.41613 | 0.86414 | 0.27279 | H12 | 0.56361 | 0.215   | 0.56304 |
| C34 | 0.1298  | 0.55839 | 0.5401  | H13 | 0.4332  | 0.78066 | 0.30871 |
| C35 | 0.87931 | 0.42335 | 0.66364 | H14 | 0.2093  | 0.65964 | 0.47119 |
| C36 | 0.93186 | 0.44303 | 0.68217 | H15 | 0.79321 | 0.46079 | 0.58021 |
| C37 | 0.9664  | 0.49577 | 0.59319 | H16 | 0.65817 | 0.20575 | 0.52959 |
| C38 | 0.94554 | 0.52644 | 0.48552 | H17 | 0.19485 | 0.55087 | 0.44093 |
| C39 | 0.89316 | 0.50635 | 0.46788 | H18 | 0.3424  | 0.79811 | 0.22187 |
| C40 | 0.54014 | 0.12144 | 0.23408 | H19 | 0.85391 | 0.38365 | 0.74242 |

|     |         |         |         |     |         |         |         |
|-----|---------|---------|---------|-----|---------|---------|---------|
| C41 | 0.50682 | 0.06808 | 0.18656 | H20 | 0.96943 | 0.5661  | 0.40715 |
| C42 | 0.52051 | 0.03111 | 0.29921 | H21 | 0.87866 | 0.5311  | 0.38119 |
| C43 | 0.56813 | 0.05042 | 0.45813 | H22 | 0.52925 | 0.14883 | 0.14157 |
| C44 | 0.60097 | 0.10356 | 0.50395 | H23 | 0.58002 | 0.02452 | 0.55649 |
| C45 | 0.11069 | 0.58797 | 0.6905  | H24 | 0.63699 | 0.11664 | 0.63138 |
| C46 | 0.05827 | 0.56904 | 0.71079 | H25 | 0.13646 | 0.62593 | 0.7958  |
| C47 | 0.02316 | 0.51836 | 0.58752 | H26 | 0.01889 | 0.45199 | 0.32738 |
| C48 | 0.04336 | 0.4896  | 0.43634 | H27 | 0.10937 | 0.48548 | 0.29592 |
| C49 | 0.09557 | 0.50897 | 0.41525 | H28 | 0.4799  | 0.85816 | 0.08613 |
| C50 | 0.46686 | 0.88401 | 0.1737  | H29 | 0.41995 | 0.97684 | 0.46676 |
| C51 | 0.50149 | 0.9376  | 0.17969 | H30 | 0.36114 | 0.88425 | 0.45076 |
